# Supplementary material for: Structural phase transitions of (Bi1−xSbx)2(Te1−ySey)3 compounds under high pressure and the influence of the atomic radius on the compression processes of tetradymites
Source: Royal Society of Chemistry journal article supplement (doi:10.1039/c6cp07324g), 2016-12-14
Supplement: c6cp07324g1.pdf [file c6cp07324g1.pdf]

## Supplementary Information

# Structural phase transitions of $(\text{Bi}_{1-x}\text{Sb}_x)_2(\text{Te}_{1-y}\text{Se}_y)_3$ compounds under high pressure and the influence of the atomic radius on the compression processes of tetradymites†

Jinggeng Zhao,<sup>\*‡ab</sup> Zhenhai Yu,<sup>‡c</sup> Qingyang Hu,<sup>cd</sup> Yong Wang,<sup>a</sup> John Schneeloch,<sup>e</sup>  
Chunyu Li,<sup>c</sup> Ruidan Zhong,<sup>e</sup> Yi Wang,<sup>ab</sup> Zhiguo Liu<sup>\*a</sup> and Genda Gu<sup>e</sup>

<sup>a</sup>*Department of Physics, Harbin Institute of Technology, Harbin 150080, China, E-mail: liuzhiguo@hit.edu.cn*

<sup>b</sup>*Natural Science Research Center, Academy of Fundamental and Interdisciplinary Sciences, Harbin Institute of Technology, Harbin 150080, China, E-mail: zhaojinggeng@163.com*

<sup>c</sup>*Center for High Pressure Science and Technology Advanced Research, Shanghai 201203, China*

<sup>d</sup>*Department of Geological Sciences, Stanford University, Stanford, CA 94305, USA*

<sup>e</sup>*Condensed Matter Physics and Materials Science Department, Brookhaven National Laboratory, Upton, NY 11973, USA*

†Electronic Supplementary Information (ESI): Schematic views of the crystal structures of  $\text{A}_2\text{B}_3$ -type tellurides and selenides (Fig. S1), experimental lattice parameters and atomic coordinates of phase IV of  $\text{Bi}_2\text{Te}_2\text{Se}$  (Table S1), calculated lattice parameters and atomic coordinates of  $\text{Bi}_2\text{Te}_2\text{Se}$  (Table S2), XRD patterns of  $\text{BiSbTeSe}_2$  and  $\text{Sb}_2\text{Te}_2\text{Se}$  under high pressure (Fig. S2), fitted results of equation of state for  $\text{A}_2\text{B}_3$ -type tellurides and selenides (Table S3), schematic views of the crystal structures of (a) tetradymite and rock salt and (b) CsCl-like structure units in the BCT and CN9M models (Fig. S3), and progression of one quintuple layer in the tetradymite series (Fig. S4).

‡These authors contributed equally to this study and share first authorship.

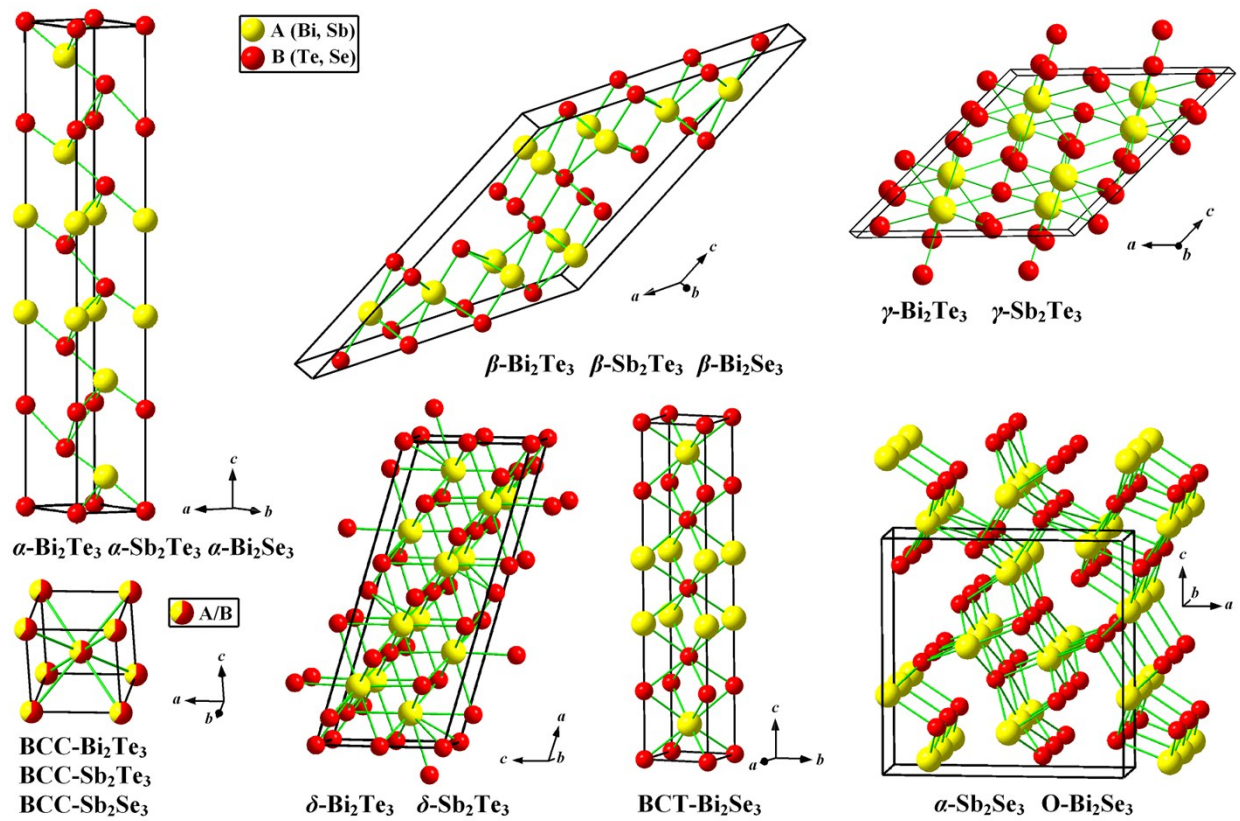

**Fig. S1** Schematic views of the crystal structures of  $A_2B_3$ -type compounds ( $A = \text{Bi, Sb}$ ;  $B = \text{Te, Se}$ ) at ambient and high pressures. The black bold lines denote the unit cells. For  $\text{Bi}_2\text{Te}_3$ ,  $\text{Sb}_2\text{Te}_3$ , and  $\text{Bi}_2\text{Se}_3$ , phase  $\alpha$  adopts a hexagonal unit cell and phase  $\beta$  adopts the unit cell from Ref. 5.

**Table S1.** Lattice parameters and atomic coordinates of phase IV of Bi<sub>2</sub>Te<sub>2</sub>Se at 30.9 GPa, which are simulated by using the body-centered tetragonal (BCT), 9/10-fold monoclinic (CN9M), and disordered body-centered cubic (BCC) structures

| Atom                                                                                                                                                                                   | Site | <i>x</i>  | <i>y</i> | <i>z</i>   |
|----------------------------------------------------------------------------------------------------------------------------------------------------------------------------------------|------|-----------|----------|------------|
| Phase IV (BCT)                                                                                                                                                                         |      |           |          |            |
| Space group: <i>I4/mmm</i> ; <i>a</i> = 3.5319(2) Å, <i>c</i> = 17.4573(17) Å; <i>R<sub>p</sub></i> = 1.41%, <i>R<sub>wp</sub></i> = 1.69%.                                            |      |           |          |            |
| Bi                                                                                                                                                                                     | 4e   | 0         | 0        | 0.4003(2)  |
| Te                                                                                                                                                                                     | 4e   | 0         | 0        | 0.2030(2)  |
| Se                                                                                                                                                                                     | 2a   | 0         | 0        | 0          |
| Phase IV (CN9M)                                                                                                                                                                        |      |           |          |            |
| Space group: <i>C2/m</i> ; <i>a</i> = 15.036(2) Å, <i>b</i> = 4.9914(3) Å, <i>c</i> = 6.0788(4) Å, <i>β</i> = 105.30(1)°; <i>R<sub>p</sub></i> = 2.02%, <i>R<sub>wp</sub></i> = 2.96%. |      |           |          |            |
| Bi(1)                                                                                                                                                                                  | 4i   | 0.3992(4) | 0        | 0.6083(8)  |
| Bi(2)                                                                                                                                                                                  | 4i   | 0.1979(6) | 0        | 0.8004(9)  |
| Te(1)                                                                                                                                                                                  | 4i   | 0.8001(6) | 0        | 0.6983(10) |
| Te(2)                                                                                                                                                                                  | 2c   | 0         | 0        | 0.5        |
| Te(3)                                                                                                                                                                                  | 2a   | 0         | 0        | 0          |
| Se                                                                                                                                                                                     | 4i   | 0.3992(5) | 0        | 0.0952(11) |
| Phase IV (disordered BCC)                                                                                                                                                              |      |           |          |            |
| Space group: <i>Im-3m</i> ; <i>a</i> = 3.5192(2) Å; <i>R<sub>p</sub></i> = 3.21%, <i>R<sub>wp</sub></i> = 4.80%.                                                                       |      |           |          |            |
| Bi/Te/Se                                                                                                                                                                               | 2a   | 0         | 0        | 0          |

**Table S2.** Calculated lattice parameters and atomic coordinates of Bi<sub>2</sub>Te<sub>2</sub>Se

| Atom                                                                                                                  | Site | <i>x</i> | <i>y</i> | <i>z</i> |
|-----------------------------------------------------------------------------------------------------------------------|------|----------|----------|----------|
| Phase I @ 5 GPa (CN6R) *                                                                                              |      |          |          |          |
| Space group: <i>R</i> -3 <i>m</i> ; <i>a</i> = 4.2318 Å, <i>c</i> = 29.092 Å.                                         |      |          |          |          |
| Bi                                                                                                                    | 6c   | 0        | 0        | 0.3956   |
| Te                                                                                                                    | 6c   | 0        | 0        | 0.2097   |
| Se                                                                                                                    | 3a   | 0        | 0        | 0        |
| Phase II @ 15 GPa (CN7M) **                                                                                           |      |          |          |          |
| Space group: <i>C</i> 2/ <i>m</i> ; <i>a</i> = 14.476 Å, <i>b</i> = 3.9375 Å, <i>c</i> = 8.9271 Å, $\beta$ = 90.55°.  |      |          |          |          |
| Bi(1)                                                                                                                 | 4i   | 0.9749   | 0        | 0.1828   |
| Bi(2)                                                                                                                 | 4i   | 0.2201   | 0        | 0.2045   |
| Te(1)                                                                                                                 | 4i   | 0.8249   | 0        | 0.3927   |
| Te(2)                                                                                                                 | 4i   | 0.4283   | 0        | 0.6242   |
| Se                                                                                                                    | 4i   | 0.3655   | 0        | 0.0033   |
| Phase III @ 15 GPa (CN8M)                                                                                             |      |          |          |          |
| Space group: <i>C</i> 2/ <i>c</i> ; <i>a</i> = 9.7931 Å, <i>b</i> = 7.0632 Å, <i>c</i> = 10.241 Å, $\beta$ = 135.53°. |      |          |          |          |
| Bi                                                                                                                    | 8f   | 0.2875   | 0.1080   | 0.3525   |
| Te                                                                                                                    | 8f   | 0.5997   | 0.3654   | 0.4625   |
| Se                                                                                                                    | 4e   | 0        | 0.3649   | 0.25     |
| Phase IV @ 30 GPa (BCT)                                                                                               |      |          |          |          |
| Space group: <i>I</i> 4/ <i>mmm</i> ; <i>a</i> = 3.5345 Å, <i>c</i> = 17.1355 Å.                                      |      |          |          |          |
| Bi                                                                                                                    | 4e   | 0        | 0        | 0.4059   |
| Te                                                                                                                    | 4e   | 0        | 0        | 0.1984   |
| Se                                                                                                                    | 2a   | 0        | 0        | 0        |
| Phase IV @ 30 GPa (CN9M)                                                                                              |      |          |          |          |
| Space group: <i>C</i> 2/ <i>m</i> ; <i>a</i> = 14.845 Å, <i>b</i> = 4.9757 Å, <i>c</i> = 6.0376 Å, $\beta$ = 105.85°. |      |          |          |          |
| Bi(1)                                                                                                                 | 4i   | 0.4084   | 0        | 0.6429   |
| Bi(2)                                                                                                                 | 4i   | 0.1939   | 0        | 0.8125   |
| Te(1)                                                                                                                 | 4i   | 0.7934   | 0        | 0.6880   |
| Te(2)                                                                                                                 | 2c   | 0        | 0        | 0.5      |
| Te(3)                                                                                                                 | 2a   | 0        | 0        | 0        |
| Se                                                                                                                    | 4i   | 0.3957   | 0        | 0.1115   |

\*Phase I adopts a hexagonal unit cell.

\*\*This structure of phase II in Table S2 is equivalent to that in Ref. 5 with same *a*- and *b*-axis and different *c*-axis and  $\beta$  angle.

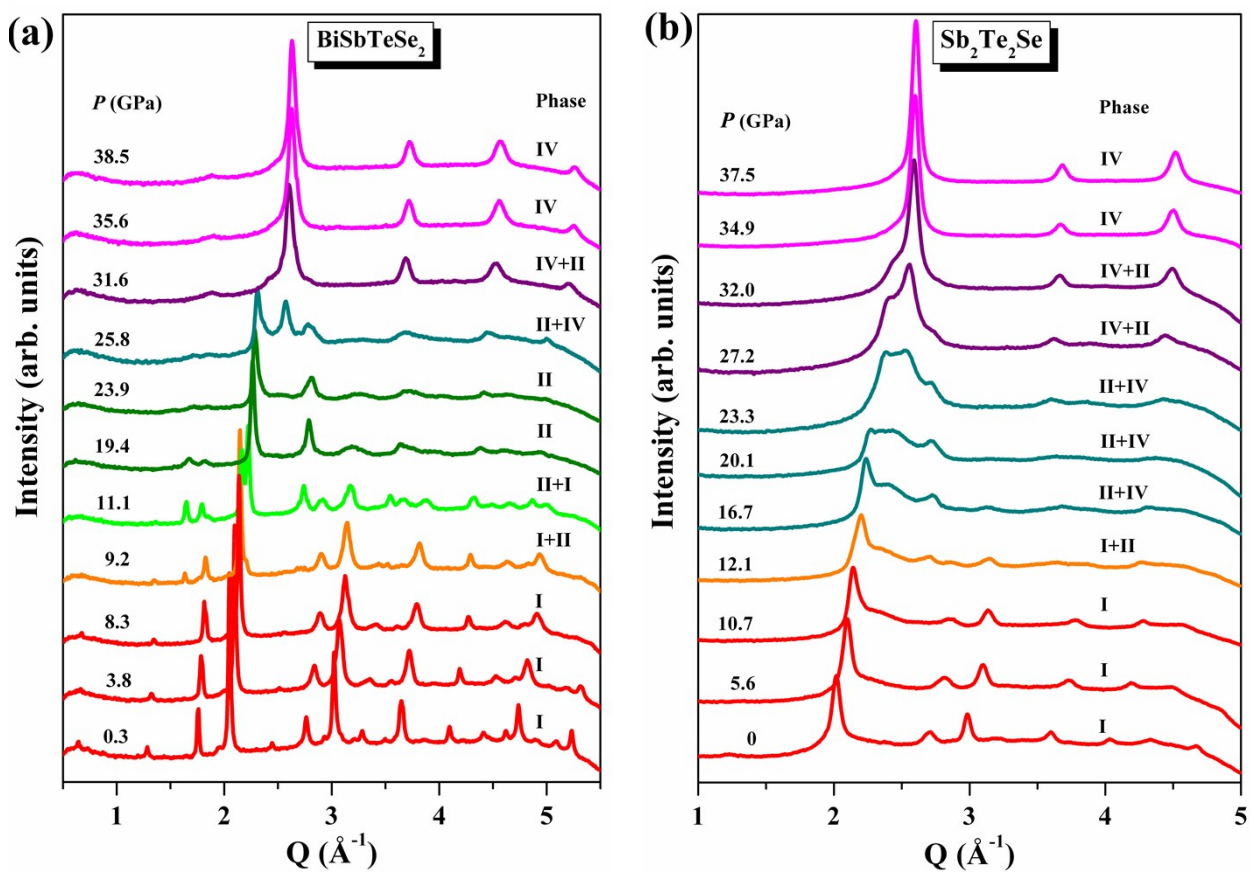

**Fig. S2** Selected angle-dispersive X-ray diffraction (AD-XRD) patterns of (a)  $\text{BiSbTeSe}_2$  and (b)  $\text{Sb}_2\text{Te}_2\text{Se}$  at room temperature up to 38.5 and 37.5 GPa, respectively.

**Table S3.** Bulk modulus ( $B_0$ ), first-order pressure derivative ( $B_0'$ ), and fitted ambient unit cell volume ( $V_0/\text{f.u.}$ ) of phases I–IV for  $A_2B_3$ -type compounds ( $A = \text{Bi, Sb; B} = \text{Te, Se}$ ) in this work and references,<sup>7–16,19,20,28,41</sup> in which “NA” and “—” represent no phase and no data, respectively

|                                                         |                  | Phase I       |                  |                                      | Phase II      |        |                                      | Phase III     |        |                                      | Phase IV    |        |                                      |
|---------------------------------------------------------|------------------|---------------|------------------|--------------------------------------|---------------|--------|--------------------------------------|---------------|--------|--------------------------------------|-------------|--------|--------------------------------------|
|                                                         |                  | $B_0$ (GPa)   | $B_0'$           | $V_0/\text{f.u.}$ ( $\text{\AA}^3$ ) | $B_0$ (GPa)   | $B_0'$ | $V_0/\text{f.u.}$ ( $\text{\AA}^3$ ) | $B_0$ (GPa)   | $B_0'$ | $V_0/\text{f.u.}$ ( $\text{\AA}^3$ ) | $B_0$ (GPa) | $B_0'$ | $V_0/\text{f.u.}$ ( $\text{\AA}^3$ ) |
| <b>Bi<sub>2</sub>Te<sub>2</sub>Se</b>                   | <b>This work</b> | 49(2)         | 4                | 157.2(4)                             | 62(2)         | 4      | 149.1(5)                             | NA            | NA     | NA                                   | 104(4)      | 4      | 133.2(7)                             |
|                                                         | <b>Ref. 41</b>   | 38.3(17)      | 5.0              | 160.6(2)                             | 68(7)         | 4      | 129.6(8)                             | NA            | NA     | NA                                   | 137(5)      | 4.0    | 114.9(1)                             |
| <b>Bi<sub>2</sub>Te<sub>1.75</sub>Se<sub>1.19</sub></b> | <b>Ref. 41</b>   | 34.5(10)      | 6.2              | 158.92(18)                           | 77(3)         | 4      | 127.3(2)                             | NA            | NA     | NA                                   | 146(3)      | 4.0    | 111.42(6)                            |
| <b>BiSbTe<sub>2</sub>Se</b>                             | <b>This work</b> | 46.5(7)       | 4                | 146.2(2)                             | 55(1)         | 4      | 140.0(6)                             | NA            | NA     | NA                                   | 63(5)       | 4      | 130.6(1.8)                           |
| <b>Sb<sub>2</sub>Te<sub>2</sub>Se</b>                   | <b>This work</b> | 44(2)         | 4                | 151.0(6)                             | 60(4)         | 4      | 143.1(1.2)                           | NA            | NA     | NA                                   | 73(4)       | 4      | 133.1(1.1)                           |
| <b>Bi<sub>2</sub>Te<sub>3</sub></b>                     | <b>Ref. 7</b>    | 21.85(20)     | 17.13 (<2.0 GPa) |                                      | —             | —      | —                                    | —             | —      | —                                    | —           | —      | —                                    |
|                                                         |                  | 38.19(42)     | 4.61 (>2.0 GPa)  |                                      | —             | —      | —                                    | —             | —      | —                                    | —           | —      | —                                    |
|                                                         | <b>Ref. 8</b>    | 41.92 (Calc.) | 4.89             | —                                    | 41.25 (Calc.) | 4.06   | —                                    | 45.28 (Calc.) | 3.57   | —                                    | —           | —      | —                                    |
|                                                         |                  | 41.61 (Calc.) | 4.68             | —                                    | —             | —      | —                                    | —             | —      | —                                    | —           | —      | —                                    |
|                                                         | <b>Ref. 9</b>    | 28.1(1.0)     | 13.8 (<3.2 GPa)  |                                      | —             | —      | —                                    | —             | —      | —                                    | —           | —      | —                                    |
|                                                         |                  | 36.3(1.0)     | 5.5 (>3.2 GPa)   |                                      | —             | —      | —                                    | —             | —      | —                                    | —           | —      | —                                    |
|                                                         | <b>Ref. 10</b>   | 56.2(12)      | 2.1              | 169.16(7)                            | 112(6)        | 6      | 148.3(7)                             | —             | —      | —                                    | —           | —      | —                                    |
| <b>BiSbTe<sub>3</sub></b>                               | <b>Ref. 10</b>   | 56(2)         | 5.27             | 164.7(2)                             | 97.5(27)      | 6.15   | 147.2(3)                             | —             | —      | —                                    | —           | —      | —                                    |
| <b>Sb<sub>2</sub>Te<sub>3</sub></b>                     | <b>Ref. 11</b>   | 54.7(2)       | 4                | 157.5(1)                             | 77.1(5)       | 4      | 148.5(8)                             | 80.5(6)       | 4      | 140.0(6)                             | 109.4(4)    | 4      | 127.5(5)                             |
|                                                         | <b>Ref. 12</b>   | 45(2)         | 4                | 158.4(5)                             | 62(3)         | 4      | 148.7(8)                             | 69(4)         | 4      | 143(1)                               | 72(2)       | 4      | 136.5(7)                             |
|                                                         | <b>Ref. 13</b>   | 41.0 (Calc.)  | 5.2              | 158.1                                | 34.74 (Calc.) | 5      | —                                    | 38.91 (Calc.) | 5      | —                                    | —           | —      | —                                    |
|                                                         | <b>Ref. 14</b>   | 36.1(9)       | 6.2              | —                                    | —             | —      | —                                    | —             | —      | —                                    | —           | —      | —                                    |
|                                                         | <b>Ref. 15</b>   | 40            | 4.0              | 158.3                                | —             | —      | —                                    | —             | —      | —                                    | —           | —      | —                                    |
|                                                         | <b>Ref. 10</b>   | 30.2(14)      | 9.4              | 159.7(2)                             | 60.8(26)      | 3.4    | 146.8(5)                             | —             | —      | —                                    | —           | —      | —                                    |
| <b>Bi<sub>2</sub>Se<sub>3</sub></b>                     | <b>Ref. 16</b>   | 53.1(7)       | 4                | 141.2(2)                             | 66(2)         | 4      | 133.4(6)                             | NA            | NA     | NA                                   | 97(3)       | 4      | 123.3(6)                             |
|                                                         | <b>Ref. 19</b>   | 53(8) (Exp.)  | 2.9              | —                                    | 66(3) (Exp.)  | 4.5    | —                                    | —             | —      | —                                    | —           | —      | —                                    |
|                                                         |                  | 47.8 (Calc.)  | 3.9              | —                                    | 60.4 (Calc.)  | 4.8    | —                                    | 77.1 (Calc.)  | 2.6    | —                                    | —           | —      | —                                    |
|                                                         |                  | 48.0 (Calc.)  | 4.6              | —                                    | —             | —      | —                                    | —             | —      | —                                    | —           | —      | —                                    |
|                                                         | <b>Ref. 20</b>   | 32.9(8)       | 5.1              | —                                    | —             | —      | —                                    | —             | —      | —                                    | —           | —      | —                                    |
| <b>Sb<sub>2</sub>Se<sub>3</sub></b>                     | <b>Ref. 28</b>   | 30(1)         | 6.1              | 136.4                                | NA            | NA     | NA                                   | NA            | NA     | NA                                   | 217(11)     | 4      | 87.25(10)                            |

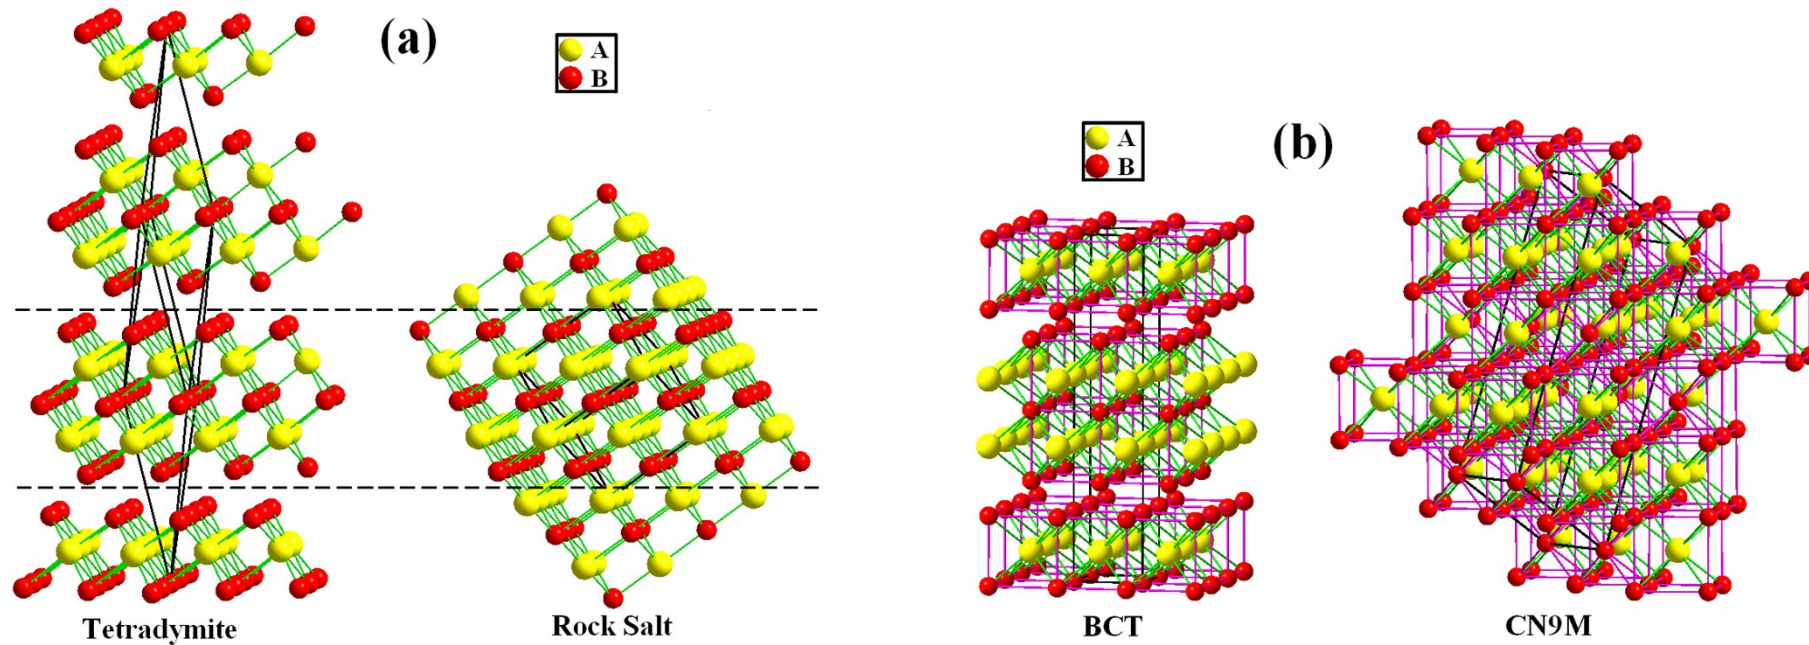

**Fig. S3** Schematic views of (a) the crystal structures of tetradymite and rock salt along the body diagonal direction and (b) the CsCl-like structure units in the BCT and CN9M models. The black bold lines denote the unit cells.

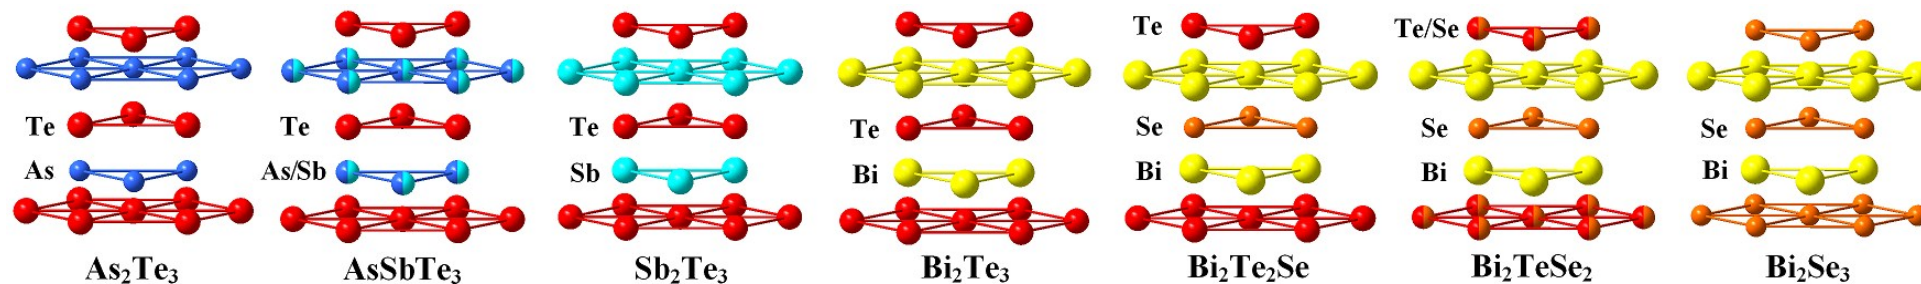

**Fig. S4** Progressions of one quintuple layer in the tetradymite series, including As<sub>2</sub>Te<sub>3</sub>, AsSbTe<sub>3</sub>, Sb<sub>2</sub>Te<sub>3</sub>, Bi<sub>2</sub>Te<sub>3</sub>, Bi<sub>2</sub>Te<sub>2</sub>Se, Bi<sub>2</sub>TeSe<sub>2</sub>, and Bi<sub>2</sub>Se<sub>3</sub>. We have used Cava's work for reference to draw this figure.<sup>79</sup>
